# Supplementary material for: RNA interference mediated suppression of TRPV6 inhibits the progression of prostate cancer in vitro by modulating cathepsin B and MMP9 expression
Source: PubMed Central journal article supplement — Investig Clin Urol. 2021 May 20;62(4):447–54. doi: 10.4111/icu.20200511 (PMC8246020; doi:10.4111/icu.20200511), 2021-05-20
Supplement: icu-62-447-s001.pdf [file icu-62-447-s001.pdf]

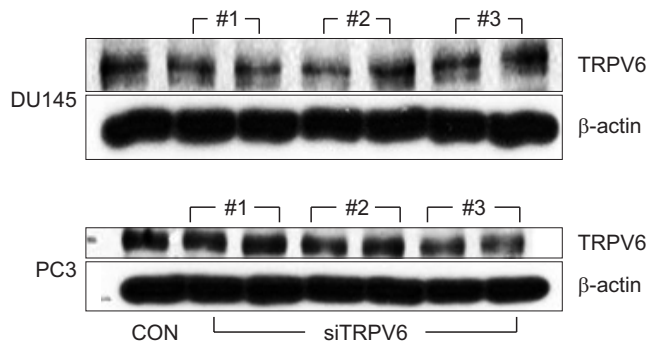

**Supplementary Fig. 1.** Knockdown efficiency of siTRPV6 in DU145 and PC3 cells. The efficacies of three different kinds of small interfering RNA against TRPV6 (siTRPV6#1, siTRPV6#2, and siTRPV6#3) were analyzed by RT-PCR in DU145 and PC3 cells. The #2 TRPV6 siRNA had the highest blocking effect as in LNCaP and DU145 cells, whereas #3 TRPV6 siRNA had the highest blocking effect in PC3 cells. siTRPV6, small interfering RNA targeting transient receptor potential cation channel vanilloid subfamily number 6; CON, control scrambled siRNA.
